# Supplementary material for: Intrinsic dynamics of randomly clustered networks generate place fields and preplay of novel environments
Source: PubMed Central journal article supplement — bioRxiv. 2024 Jun 19:2023.10.26.564173. Originally published 2023 Oct 31. Preprint. [Version 3] doi: 10.1101/2023.10.26.564173 (PMC10634993; doi:10.1101/2023.10.26.564173), 2024-06-19
Supplement: NIHPP2023.10.26.564173V1-supplement-1.pdf [file NIHPP2023.10.26.564173V1-supplement-1.pdf]

861 **Supplemental figures**

862

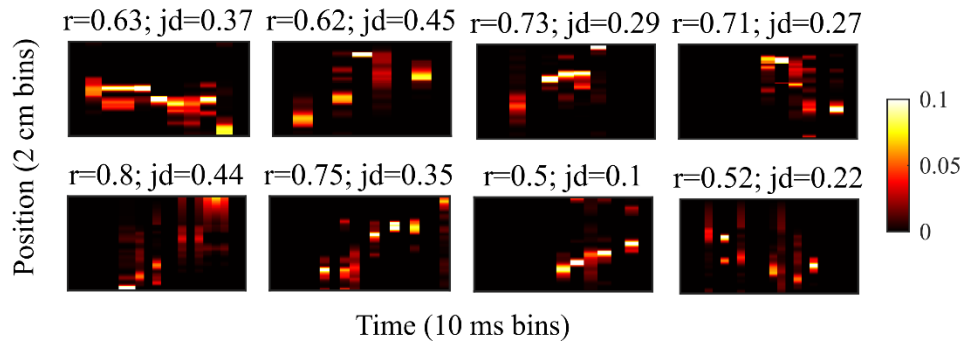

863 **Figure 4—figure supplement 1: Example preplay events from the Shin et al., 2019**  
864 **data**

865 Example preplay events. Same as Figure 2f but for events from the hippocampal data from  
866 Shin et al., 2019. The height of each plot spans the length of the trajectory used for  
867 decoding, divided into 2 cm spatial bins. The width of each plot spans the duration of the  
868 detected event, divided into 10 ms time bins. Probability is show in color.

869

870

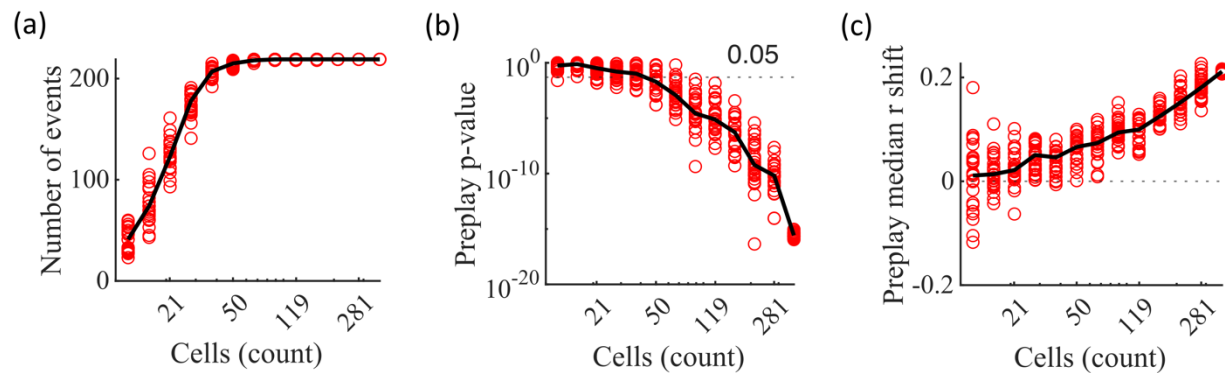

871 **Figure 4—figure supplement 2: Significant preplay can typically be identified with as**  
872 **few as 50 cells**

873 **(a-c)** Results from performing the same Bayesian decoding on the same simulated  
874 population burst events (PBEs) in Figure 4c but using only random subsets of the  
875 excitatory cells for performing the decoding analysis. Each circle is the result of an analysis  
876 performed on one random subset of the cells. 25 random subsets were analyzed for each  
877 analyzed cell count. The subset sizes are logarithmically spaced. Black lines show the  
878 median value. The variability at N=375 is due to the variation in the randomness of the  
879 time-bin shuffles. **(a)** Number of events meeting the inclusion criterion for decoding  
880 analysis. **(b)** P-value of the KS-test comparing actual vs shuffled event absolute weighted  
881 correlations. A majority of the random subsets of 50 cells (17 out of 25) produce preplay p-  
882 values below 0.05. **(c)** Shift in the median absolute weighted correlation of actual events  
883 relative to shuffled events.

884

885

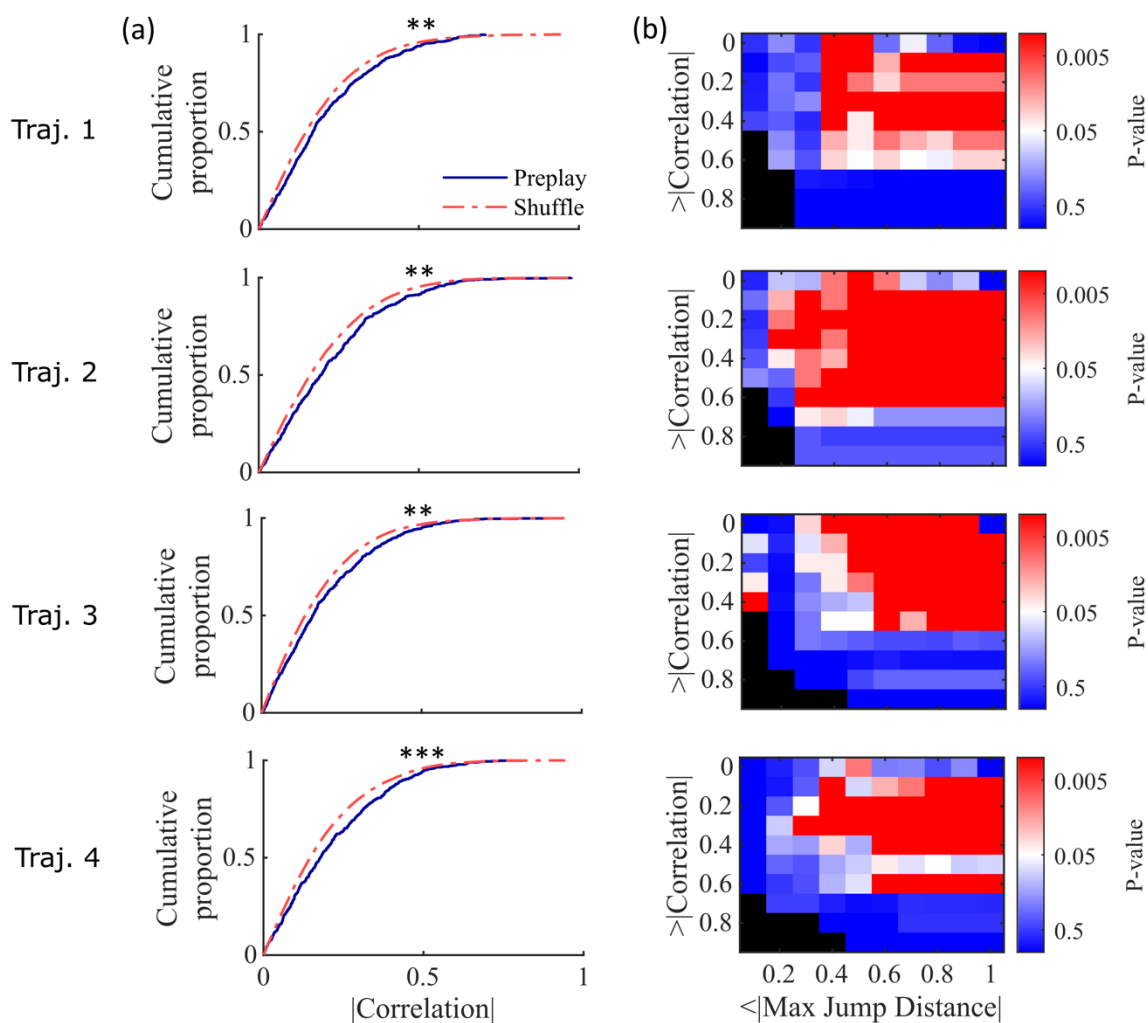

886 **Figure 4—figure supplement 3: Preplay statistics by trajectory for Shin et al., 2019**  
887 **data.**

888 **(a)** Same as Figure 4a but separated by results from decoding by each of the 4 trajectories  
889 of the W-track individually (trajectory 1, center arm to right arm; trajectory 2, right arm to  
890 center arm; trajectory 3, center arm to left arm; trajectory 4, left arm to center arm). KS-  
891 test for each trajectory: trajectory 1,  $p=0.0030$ ; trajectory 2,  $p=0.0028$ ; trajectory 3,  
892  $p=0.0027$ ; trajectory 4,  $p=5.461 \times 10^{-5}$ . \*\*  $p < 0.01$ , \*\*\*  $p < 0.001$ . **(b)** Same as Figure 4b but  
893 separated by results from decoding by each of the 4 trajectories individually.

894

895
